# Supplementary material
Source: HighWire-hosted journal article supplement (https://www.cmajopen.ca/highwire/filestream/88088/field_highwire_adjunct_files/1/open-2021-0323-original-submission.pdf)
Supplement: open-2021-0323-original-submission.pdf [file open-2021-0323-original-submission.pdf]

1  
2  
3  
4  
5  
6  
7  
8  
9  
**LESSONS FROM THE COVID-19 THIRD WAVE IN CANADA: THE IMPACT OF  
VARIANTS OF CONCERN AND SHIFTING DEMOGRAPHICS**

10  
11  
12  
13  
14  
15  
16  
17  
18  
19  
20  
21  
22  
23  
24  
25  
26  
27  
28  
29  
30  
31  
32  
33  
34  
35  
36  
37  
38  
39  
40  
41  
42  
43  
44  
45  
46  
47  
48  
49  
50  
51  
52  
53  
54  
55  
56  
57  
58  
59  
60  
Finlay A. McAlister,<sup>1,2,3</sup> MD MSc; Majid Nabipoor,<sup>2</sup> PhD; Anna Chu,<sup>4,5</sup> MHSc; Douglas S. Lee,<sup>4,5,6</sup> MD PhD; Lynora Saxinger,<sup>1</sup> MD; Jeffrey A. Bakal,<sup>1,2</sup> PhD on behalf of the CORONA Collaboration

**From:**

<sup>1</sup>The Department of Medicine, Faculty of Medicine and Dentistry, University of Alberta, Edmonton, Alberta, Canada

<sup>2</sup>The Alberta Strategy for Patient Oriented Research Support Unit, Canada

<sup>3</sup>The Canadian VIGOUR Centre, University of Alberta, Edmonton, Canada

<sup>4</sup> ICES (formerly Institute for Clinical Evaluative Sciences), Toronto, Canada

<sup>5</sup> University of Toronto, Toronto, Canada

<sup>6</sup> University Health Network, Toronto, Canada,

**Supported by:** CIHR COVID-19 Rapid Research Funding Opportunity grant (#VR4 172736)

**Disclosures:** FAM holds the Alberta Health Services Chair in Cardiovascular Outcomes Research, DSL is the Ted Rogers Chair in Heart Function Outcomes, University Health Network, University of Toronto. None of the authors have any competing interests to declare.

**Correspondence:** Dr. F. McAlister, 5-134C Clinical Sciences Building  
11350 83 Avenue  
Edmonton, Alberta, Canada T6G 2G3  
Tele: (780) 492-7387 Fax: (780) 492-7277  
e-mail: [Finlay.McAlister@ualberta.ca](mailto:Finlay.McAlister@ualberta.ca)

**Counts:**

-abstract words 257, text words 2265

-table 1

-references 22

## ABSTRACT

**Background:** We examined 30-day outcomes in Canadians with COVID-19 during the first 3 waves of the pandemic.

**Methods:** Retrospective cohort study using linked healthcare datasets in Alberta and Ontario to identify all-cause hospitalizations or deaths within 30 days after a positive SARS-CoV-2 reverse transcriptase polymerase chain reaction test from March 1, 2020 until June 30, 2021, with genomic confirmation of variants of concern (VOC).

**Results:** Compared to the 372,070 individuals with SARS-CoV-2 infection between March 2020 and January 2021 (first 2 waves in Canada), there was a shift in transmission towards younger patients in the 359,079 COVID-19 wave three cases. Third wave patients were more likely to be hospitalized (aOR 1.57 [95%CI 1.46-1.70]), but had shorter lengths of stay (median 6 vs. 7 days,  $p < 0.001$ ) and lower 30 day mortality (aOR 0.73 [0.65-0.81]). The 217,892 third wave patients infected with VOC (83.5% confirmed Alpha, 1.7% confirmed Delta) exhibited higher risks of death (aOR 1.42 [1.05-1.91]) and hospitalization (aOR 1.67 [1.33-2.10]) than those with wild type infections. Specifically, those with Delta variant infections exhibited higher 30-day risks of death (aOR 2.10 [1.53–2.89]) and hospitalization (aOR 2.21 [1.34 – 3.64]) than those with non-VOC infections in wave 3.

**Interpretation:** There has been a shift towards younger patients, more hospitalizations, shorter lengths of stay, and lower mortality risk during the third wave compared to the first 10 months of the pandemic in Canada. However, in spite of advances in COVID-19 care, infection with a VOC is associated with substantially higher risks of hospitalization or death than the original wild-type SARS-CoV-2.

1  
2  
3  
4  
5  
6 Since December 2020, the World Health Organization has recognized 4 variants  
7  
8 of concern (VOC) for SARS-CoV-2 as they are more transmissible.[1,2] While  
9  
10 preliminary reports from the United Kingdom and Europe suggested VOC infections are  
11  
12 more severe, there is a paucity of North American evidence.[3,4] The third wave of  
13  
14 COVID-19 in Canada occurred between February and June 2021 and was driven by  
15  
16 VOC, particularly Alpha (B.1.1.7) and emerging Delta (B.1.617) variants, with Gamma  
17  
18 (P1) and Beta (B.1.351) largely seen only in returning travellers. The Alpha variant has  
19  
20 been associated with higher risks of mortality (approximately 64% in a UK case-control  
21  
22 study and 59% in a UK cohort study)[5,6] and hospitalization (52% in a UK cohort  
23  
24 study[6] and approximately 70% in the European Surveillance System data)[7].  
25  
26 However, the UK studies[5,6] relied solely on community tests, omitting as many as  
27  
28 70% of COVID-19 deaths occurring in patients diagnosed after hospital admission, and  
29  
30 in the European study[7] less than 1% of SARS-CoV-2-positive specimens were  
31  
32 sequenced for variants. A pre-print from Denmark also reported higher hospitalization  
33  
34 rates with the Alpha variant, but was based on only 128 (of 1235 total) hospitalizations  
35  
36 and the difference was only detected in adjusted analyses.[8] Thus, questions remain  
37  
38 about disease severity and trajectories (i.e., timing of hospitalizations or death) with  
39  
40 VOC compared to the original SARS-CoV-2 clade in North America, crucial information  
41  
42 for health system planners. In particular, given emerging evidence that the Delta variant  
43  
44 replicates faster and Delta-infected individuals have much higher viral loads (over 1,200  
45  
46 fold compared to the original wild-type)[9], there is an urgent need to define the  
47  
48  
49  
50  
51  
52  
53  
54  
55  
56  
57  
58  
59  
60

1  
2  
3 phenotype of Delta variant infections since it will rapidly become the most common  
4  
5 circulating strain.  
6

7  
8 To address this gap in the literature, we examined 30-day outcomes in  
9  
10 Canadians infected with SARS-CoV-2 in the first 15 months of the pandemic and to  
11  
12 compare event rates in those with VOC versus wild-type infection.  
13  
14  
15

## 16 17 **METHODS**

### 18 19 ***Subjects and Setting***

20  
21 We conducted a retrospective cohort study in two of Canada's most populous  
22  
23 provinces - Alberta and Ontario. Canadian healthcare is a government funded single-  
24  
25 payer system with free universal access to hospital, emergency department (ED),  
26  
27 laboratory, and physician services and each province is the legal custodian of the health  
28  
29 data for its citizens. Ethical approval for this study was granted by the University of  
30  
31 Alberta Health Ethics Research Board (Pro00101096), with waiver of individual patient  
32  
33 signed informed consent for Alberta data as we analyzed de-identified healthcare  
34  
35 administrative data. The use of Ontario data is authorized under section 45 of Ontario's  
36  
37 Personal Health Information Protection Act (PHIPA) and does not require review by a  
38  
39 Research Ethics Board. We linked SARS-CoV-2 reverse transcriptase Polymerase  
40  
41 Chain Reaction (RT-PCR) testing data from the Alberta and Ontario provincial  
42  
43 laboratories with administrative health databases in each province which capture all ED  
44  
45 visits (the National Ambulatory Care Reporting System), hospitalizations and ICU  
46  
47 admissions (the Discharge Abstract Database), and demographics, geographic locale,  
48  
49 and deaths (the Health Care Insurance Registry files of each province).  
50  
51  
52  
53  
54  
55  
56  
57  
58  
59  
60

### ***Definition of Cases, Index Date, and Outcomes***

The study population included all individuals (outpatients and inpatients) with a positive SARS-CoV-2 reverse transcription polymerase chain reaction (RT-PCR) nasopharyngeal swab from March 1, 2020 until June 30, 2021, with genomic confirmation of all VOC screen-positive tests after February 7, 2021. For patients tested multiple times during our study, we only examined the data related to their first positive SARS-CoV-2 test. Index date was the date of the first positive RT-PCR test and outcomes examined included ED visits, hospitalizations, ICU admissions, and/or deaths in the first 30 days after the positive RT-PCR test.

### ***Covariates***

We identified comorbidities for each patient (and generated their Charlson Comorbidity Scores) using standardized ICD-9 and ICD-10-CA case definitions (previously validated in Alberta and Ontario)[10] based on all hospitalizations in the 2 years prior to and including the index date for each individual.

### ***Statistical Analyses***

We present summary statistics stratified according to the timing of the positive SARS-CoV-2 swab and, for those detected after February 1, 2021 whether they had VOC or wild-type SARS-CoV-2 detected. We compared outcome risks after adjusting for age, sex, and Charlson Comorbidity Score (which includes the most important of the QCOVID risk score factors [<https://qccovid.org/>] such as diabetes, pulmonary disease, kidney disease, heart failure, neurologic disease, and cancer). All analyses were conducted using SAS 9.4 [Cary, NC, USA] within each province separately. We then pooled the aOR for each province using meta-analysis. Although both Alberta and

1  
2  
3 Ontario used a common protocol and common case definitions for comorbidities, there  
4 are still several potential sources of heterogeneity between the provinces (such as  
5 differences in populations, drug formulary restrictions, data capture, and SARS-CoV-2  
6 testing priorities). Therefore, as per the convention of the Canadian Network for  
7  
8  
9  
10  
11  
12  
13  
14  
15  
16  
17  
18  
19  
20  
21  
22  
23  
24  
25  
26  
27  
28  
29  
30  
31  
32  
33  
34  
35  
36  
37  
38  
39  
40  
41  
42  
43  
44  
45  
46  
47  
48  
49  
50  
51  
52  
53  
54  
55  
56  
57  
58  
59  
60

Ontario used a common protocol and common case definitions for comorbidities, there are still several potential sources of heterogeneity between the provinces (such as differences in populations, drug formulary restrictions, data capture, and SARS-CoV-2 testing priorities). Therefore, as per the convention of the Canadian Network for Observational Drug Effect Studies (<https://www.cnodes.ca/>), we conducted a random effect meta-analysis using package 'metafor' in R package version 1.4-0 (<http://CRAN.R-project.org/package=metafor>). We used the restricted maximum likelihood estimator to estimate the population heterogeneity due to its high efficiency compared to other estimators when number of effect sizes is small.

### ***Data Disclosure***

To comply with each province's Health Information Protection Act, the dataset used for this study cannot be made publicly available but requests to access the dataset from qualified researchers trained in human subject confidentiality protocols may be sent to the corresponding author (Dr. Finlay McAlister).

## **RESULTS**

Compared to the 372,070 individuals with SARS-CoV-2 positive samples between March 2020 and January 2021 (the Canadian first and second waves), there was a leftward shift in age distribution for the 359, 079 COVID-19 cases identified in the third wave in Alberta and Ontario (Table). The percentage of test samples positive for SARS-CoV-2 was similar in all 3 waves (5.2% overall). Hospitalization rates within 30 days were higher in the third wave (5.6% vs. 5.4%,  $p < 0.001$ ), a difference which remained statistically significant after adjusting for the differences in demographics and

1  
2  
3 comorbidity burdens (aOR 1.51 [95%CI 1.44-1.58] in Alberta, aOR 1.63 [1.59-1.67] in  
4 Ontario, and pooled aOR 1.57 [1.46-1.70] for third wave patients vs. earlier waves).  
5  
6 However, hospital lengths of stay were shorter in the third wave (median 5 vs. 7 days in  
7 Alberta and 6 vs. 7 days in Ontario, both  $p < 0.001$ ) than in the first and second waves.  
8  
9 Patients with COVID-19 during the third wave were also less likely to die within 30 days  
10 (0.9% vs. 2.2%,  $p < 0.0001$ ) than those in the first and second waves, even after  
11  
12 adjusting for their younger age and lower comorbidity burdens (aOR 0.68 [0.61-0.76] in  
13 Alberta, aOR 0.76 [0.72-0.80] in Ontario, and pooled aOR 0.73 [0.65-0.81]).  
14  
15  
16  
17  
18  
19  
20  
21

22 Examining third wave data only, of the 359,079 patients with SARS-CoV-2  
23 positive samples between February and June 2021, 310,319 (86%) were screened for  
24 VOC, of which 217,892 (70.2%) were confirmed VOC positive, 182,020 (83.5%) were  
25 the Alpha variant and 3,708 (1.7%) Delta. After adjusting for age, sex and  
26  
27 comorbidities, VOC-infected patients exhibited higher 30-day risks of death (aOR 1.67  
28 [1.36-2.05] in Alberta, aOR 1.23 [1.09-1.39] in Ontario, and pooled aOR 1.42 [1.05-1.91])  
29 and hospitalization (aOR 1.88 [1.74-2.02] in Alberta, aOR 1.49 [1.42-1.57] in Ontario,  
30  
31 and pooled aOR 1.67 [1.33-2.10]) than those with non-VOC infections in the same  
32  
33 timeframe. Those with Delta variant infections exhibited higher 30-day risks of death  
34 (aOR 5.44 [2.65 - 11.17] in Alberta, aOR 1.67 [1.17-2.38] in Ontario, and pooled aOR  
35  
36 2.10 [1.53–2.89]) and hospitalization (aOR 2.94 [2.08 - 4.14] in Alberta, aOR 1.76 [1.52-  
37  
38 2.04] in Ontario, and pooled aOR 2.21 [1.34-3.64]) than those with non-VOC infections  
39  
40 during the third wave. However, length of hospital stays and times between positive  
41  
42 swab and death were similar among patients with VOC versus wild-type infections in the  
43  
44 third wave.  
45  
46  
47  
48  
49  
50  
51  
52  
53  
54  
55  
56  
57  
58  
59  
60

## DISCUSSION

Our data provides a description of disease severity phenotypes for SARS-CoV-2 VOC in Canada, which is important for public health messaging and for health system planners. Our finding of a 42% higher mortality risk with predominantly Alpha VOC infections in Canada is consistent with effect estimates from the UK and Europe.[4,5,7] However, given that the third wave in Canada affected younger patients more than the first two waves (at least partially due to vaccination eligibility criteria in early 2021) and the increasing use of proven efficacious therapies like corticosteroids, we also found that the case fatality rate was 27% lower in the third wave compared to the earlier waves, even though hospitalization risk increased by 57% in the third wave.

Our finding that individuals infected with a VOC were more likely to require hospitalization than those with wild type SARS-CoV-2 is consistent with reports from UK and Europe of a higher hospitalization risk with the VOC (over 80% of which were Alpha in those studies).[6-8] Our finding of even higher event rates in individuals infected with the Delta variant confirms reports from Scotland (85% higher hospitalization risk with Delta variant infections compared to those with the Alpha variant)[11] and England (aHR for hospitalization with the Delta variant of 2.26 compared to Alpha).[12] Indeed, a preprint from Ontario has also reported a markedly higher risk of hospitalization and death in patients infected with the Delta variant (with aOR of 2.08 and 2.32 respectively).[13] These findings suggest that communities with high Delta transmission could experience major potential impacts on health system capacity compared to previous waves. In particular, the 8% hospitalization risk in individuals infected with the



1  
2  
3 Delta variant during the third wave in Alberta and Ontario is concerning as Delta  
4  
5 continues to spread and becomes the dominant strain in Canada. Of note, although we  
6  
7 did not have access to vaccination data in individually linkable form for analysis, it is  
8  
9 worth noting that the vast majority of hospitalizations occur in unvaccinated or partially  
10  
11 vaccinated individuals: for example, 91% in Alberta since January 1, 2021 and 83% of  
12  
13 currently hospitalized patients on August 31, 2021 ([https://www.alberta.ca/stats/covid-](https://www.alberta.ca/stats/covid-19-alberta-statistics.htm#vaccine-outcomes)  
14  
15 [19-alberta-statistics.htm#vaccine-outcomes](https://www.alberta.ca/stats/covid-19-alberta-statistics.htm#vaccine-outcomes) last accessed August 31, 2021).  
16  
17  
18

19 A major strength of our study is that the majority of SARS-CoV-2-positive  
20  
21 specimens during the Alberta and Ontario third wave were screened for VOC with  
22  
23 subsequent genomic confirmation of screen positives, compared with very low  
24  
25 proportions in other studies describing VOC disease severity (for example, only 0.7% in  
26  
27 the recent report from the European Surveillance System[7]). A limitation of our  
28  
29 analysis is that it is largely based on Alpha variant infections, although we do have 30  
30  
31 day outcome data from over 3700 Delta variant infected individuals.[3,6,7] As with other  
32  
33 studies comparing VOC and non-VOC infections, our sampling frame may result in  
34  
35 overestimates of absolute risks since minimally symptomatic or asymptomatic patients  
36  
37 are less likely to be tested.[14] However, we examined all positive community cases,  
38  
39 which is less biased than studying only hospitalized cases (which prior studies have  
40  
41 done) and sample positivity rates were similar in all 3 waves (approximately 5%). To  
42  
43 the extent that Alpha or Delta variants infections may have been circulating in Alberta  
44  
45 and Ontario before VOC screening began, our results may underestimate the impact of  
46  
47 VOC on outcomes since events in undiagnosed VOC infections would be included in  
48  
49 our wild-type controls (although the Public Health Agency of Canada update from  
50  
51  
52  
53  
54  
55  
56  
57  
58  
59  
60

1  
2  
3 February 19, 2021 suggested there were few VOC cases nationally even 10 days after  
4 widespread screening had started in Alberta and Ontario:  
5

6  
7 [https://www.canada.ca/content/dam/phac-aspc/documents/services/diseases-](https://www.canada.ca/content/dam/phac-aspc/documents/services/diseases-maladies/coronavirus-disease-covid-19/epidemiological-economic-research-data/update-covid-19-canada-epidemiology-modelling-20210219-en.pdf)  
8  
9 [maladies/coronavirus-disease-covid-19/epidemiological-economic-research-](https://www.canada.ca/content/dam/phac-aspc/documents/services/diseases-maladies/coronavirus-disease-covid-19/epidemiological-economic-research-data/update-covid-19-canada-epidemiology-modelling-20210219-en.pdf)  
10  
11 [data/update-covid-19-canada-epidemiology-modelling-20210219-en.pdf](https://www.canada.ca/content/dam/phac-aspc/documents/services/diseases-maladies/coronavirus-disease-covid-19/epidemiological-economic-research-data/update-covid-19-canada-epidemiology-modelling-20210219-en.pdf)).  
12  
13

14 Unfortunately, the duration of the pre-symptomatic stage (and the frequency of  
15 asymptomatic cases) with different SARS-CoV-2 clades are not yet described and  
16 cannot be assessed using our dataset. Moreover, as we do not have access to in-  
17 hospital treatments, we cannot adjust for the impact of therapies proven beneficial in the  
18 treatment of COVID (such as corticosteroids) when examining trends in mortality rates.  
19

20 Finally, although we do not have data on vaccination status in our dataset, initial  
21 vaccine roll-out in Canada focused on long term care residents, the very elderly,  
22 indigenous adults, and front line health care workers only and it was not until mid-March  
23 that vaccination eligibility criteria expanded to include other groups in both  
24 provinces.[15,16] The Ontario pre-print mentioned earlier was able to adjust for  
25 vaccination status and reported very similar aOR as we did for hospitalizations and all-  
26 cause mortality with the Delta and Alpha variants.[13] In addition, preliminary data from  
27 England has also shown that the elevated hazard ratio (HR) for hospitalization among  
28 vaccinated individuals who contract Delta variant infections is not significantly different  
29 than the HR for unvaccinated or partially vaccinated individuals ( $p=0.82$ ). Of course, it  
30 deserves emphasizing that the absolute risks for hospitalization or poor outcomes is  
31 substantially lower in vaccinated individuals than in those who are unvaccinated or  
32 partially vaccinated, even with the Delta variant.[11,13,17]  
33  
34  
35  
36  
37  
38  
39  
40  
41  
42  
43  
44  
45  
46  
47  
48  
49  
50  
51  
52  
53  
54  
55  
56  
57  
58  
59  
60

1  
2  
3 While genomic monitoring for the evolution of SARS-CoV-2 VOCs is crucial,[18]  
4 we believe it is equally important to describe disease expression and outcomes among  
5 patients infected with VOC to fully understand both the disease phenotype and the  
6 anticipated burdens for the healthcare system. Although preliminary data regarding the  
7 effectiveness of current full vaccination schedules against hospitalization and death  
8 from the VOC remain encouraging,[19-21] continued assessment of disease severity  
9 phenotypes in different jurisdictions in vaccinated and unvaccinated individuals and as  
10 VOCs evolve is important.  
11  
12  
13  
14  
15  
16  
17  
18  
19  
20

21 For health system planners, the COVID-19 pandemic has shifted towards  
22 younger age groups and more hospitalizations but shorter lengths of stay and lower  
23 mortality risk in the third wave than seen in the first 10 months of the pandemic.  
24 However, high community transmission rates for the Delta variant could result in  
25 substantial increases in hospital admissions and affect healthcare capacity again – the  
26 pandemic is definitely not waning. Our demonstration that the VOC are associated with  
27 substantially higher risk of hospitalization or death than infections with the original wild-  
28 type strain in Canada is also important for individual patient counselling to address  
29 vaccine hesitancy and public information campaigns reinforcing the need for continued  
30 risk reduction measures such as social distancing and masking.  
31  
32  
33  
34  
35  
36  
37  
38  
39  
40  
41  
42  
43  
44  
45  
46  
47  
48  
49  
50  
51  
52  
53  
54  
55  
56  
57  
58  
59  
60

1  
2  
3  
4 **Acknowledgements:** The Ontario portion of this study was supported by and  
5 conducted within ICES, which is funded by an annual grant from the Ontario Ministry of  
6 Health (MOH) and the Ministry of Long-Term Care (MLTC). Parts of this material are  
7 based on data and information provided by the Canadian Institute for Health Information  
8 (CIHI) and MOH. These data were provided to ICES under section 45 of PHIPA and  
9 may only be used for the "purpose of analysis or compiling statistical information with  
10 respect to the management of, evaluation or monitoring of, the allocation of resources to  
11 or planning for all or part of the health system. The analyses, opinions, results, and  
12 conclusions expressed herein are solely those of the authors and do not necessarily  
13 reflect those of the funding or data sources; no endorsement is intended or should be  
14 inferred; no endorsement is intended or should be inferred. The Alberta portion of this  
15 study was supported by and conducted within the Alberta Strategy for Patient Oriented  
16 Research Support Unit. This study is based in part on data provided by Alberta Health  
17 and Alberta Health Services. The interpretation and conclusions contained herein are  
18 those of the researchers and do not represent the views of the Government of Alberta  
19 or Alberta Health Services. Neither the Government of Alberta nor Alberta Health  
20 Services express any opinion in relation to this study.  
21  
22  
23  
24  
25  
26  
27  
28  
29  
30  
31  
32  
33  
34  
35  
36  
37  
38  
39  
40  
41  
42  
43  
44  
45  
46  
47  
48  
49  
50  
51  
52  
53  
54  
55  
56  
57  
58  
59  
60

**REFERENCES:**

1. Fontanet A, Autran B, Lina B, Kieny MP, Karim SSA, Sridhar D. SARS-CoV-2 variants and ending the COVID-19 pandemic. *Lancet* 2021;397:952-954. doi: 10.1016/S0140-6736(21)00370-6.
2. CDC. Variants of the virus. 2021; updated Aug 11, 2021. <https://www.cdc.gov/coronavirus/2019-ncov/variants/variants.html> (Last accessed August 18, 2021).
3. Curran J, Dol J, Boulos L, Somerville M, McCulloch H. Public Health and Health Systems Impacts of SARS-CoV-2 Variants of Concern: A Rapid Scoping Review [last updated June 6, 2021]. medRxiv 2021.05.20.21257517; doi: <https://doi.org/10.1101/2021.05.20.21257517>
4. Davies NG, Jarvis CI, CMMID COVID-19 Working Group, et al. Increased mortality in community-tested cases of SARS-CoV-2 lineage B.1.1.7. *Nature* 2021;March 15: <https://doi.org/10.1038/s41586-021-03426-1>
5. Challen R, Brooks-Pollock E, Read J M, Dyson L, Tsaneva-Atanasova K, Danon L et al. Risk of mortality in patients infected with SARS-CoV-2 variant of concern 202012/1: matched cohort study. *BMJ* 2021;372:n579
6. Nyberg T, Twohig KA, Harris RJ, Seaman SR, Flannagan J, Allen H, et al. Risk of hospital admission for patients with SARS-CoV-2 variant B.1.1.7: cohort analysis. *BMJ*. 2021;373:n1412.
7. Funk T, Pharris A, Spiteri G, Bundle N, Melidou A, Carr M, et al. Characteristics of SARS-CoV-2 variants of concern B.1.1.7, B.1.351 or P.1: data from seven EU/EEA countries, weeks 38/2020 to 10/2021. *Euro Surveill* 2021;26:pii=2100348. <https://doi.org/10.2807/1560-7917.ES.2021.26.16.2100348>
8. Bager P, Wohlfahrt J, Fonager J, et al. Increased risk of hospitalisation associated with infection with SARS-CoV-2 lineage B.1.1.7 in Denmark. *Lancet Preprint* at SSRN: <https://doi.org/10.2139/ssrn.3792894> (Last accessed Aug 18, 2021).
9. Li B, Deng A, Li K, Hu Y, Li Z, Xiong Q, et al. Viral infection and transmission in a large, well-traced outbreak caused by the SARS-CoV-2 Delta variant. medRxiv 2021.07.07.21260122; doi: <https://doi.org/10.1101/2021.07.07.21260122>
10. Tonelli M, Wiebe N, Fortin M, et al. for the Alberta Kidney Disease Network. Methods for identifying 30 chronic conditions: application to administrative data. *BMC Medical Informatics and Decision Making* 2015;15:31. DOI 10.1186/s12911-015-0155-5

11. Sheikh A, McMenamin J, Taylor B, Robertson C. SARS-CoV-2 Delta VOC in Scotland: demographics, risk of hospital admission, and vaccine effectiveness. *Lancet* 2021;397:2461-2462.
12. Twohig KA, Nyberg T, Zaidi A, et al. Hospital admission and emergency care attendance risk for SARS-CoV-2 delta (B.1.617.2) compared with alpha (B.1.1.7) variants of concern: a cohort study. *Lancet Infect Dis* 2021;published online early August 27, 2021. doi.org/10.1016/S1473-3099(21)00475-8
13. Fisman DN, Tuite AR. Progressive Increase in Virulence of Novel SARS-CoV-2 Variants in Ontario, Canada. medRxiv. 2021 August 4; <https://doi.org/10.1101/2021.07.05.21260050>
14. Griffith GJ, Morris TT, Tudball MJ, et al. Collider bias undermines our understanding of COVID-19 disease risk and severity. *Nature Communications* 2020;11:5749.
15. Ismail SJ, Zhao L, Tunis MC, et al. Key populations for early COVID-19 immunization: preliminary guidance for policy. *CMAJ* 2020;192:E1620-32.
16. McAlister FA, Bushnik T, Leung AA, Saxinger L. Informing COVID-19 vaccination priorities based on the prevalence of risk factors among adults in Canada. *CMAJ*. 2021;193:E617-E621.
17. Griffin JB, Haddix M, Danza P, et al. SARS-CoV-2 Infections and Hospitalizations Among Persons Aged ≥16 Years, by Vaccination Status — Los Angeles County, California, May 1–July 25, 2021. *MMWR Morb Mortal Wkly Rep* 2021;70:1170–1176.
18. Alam I, Radovanovic A, Incitti R, Kamau AA, Alarawi M, Azhar EI, et al. CovMT: an interactive SARS-CoV-2 mutation tracker, with a focus on critical variants. *Lancet Infect Dis* 2021. [PMID: 33571446] doi: 10.1016/S1473-3099(21)00078-5
19. Sah P, Vilches TN, Moghadas SM, Fitzpatrick MC, Sing BH, Hotez PJ, Galvani AP. Accelerated vaccine rollout is imperative to mitigate highly transmissible COVID-19 variants. *E Clinical Medicine* 2021;35:100865
20. Iorio A, Little J, Linkins L, Abdelkader W, Bennett D, Lavis JN. COVID-19 living evidence synthesis #6 (version 6.17): What is the efficacy and effectiveness of available COVID-19 vaccines in general and specifically for variants of concern? Hamilton: Health Information Research Unit, August 25 2021.
21. Lopez Bernal J, Andrews N, Gower C, Gallagher E, Simmons R, Thelwall S, Stowe J, Tessier E, Groves N, Dabrera G, Myers R, Campbell CNJ, Amirthalingam G, Edmunds M, Zambon M, Brown KE, Hopkins S, Chand M, Ramsay M. Effectiveness of Covid-19 Vaccines against the B.1.617.2 (Delta)

1  
2  
3  
4  
5  
6  
7  
8  
9  
10  
11  
12  
13  
14  
15  
16  
17  
18  
19  
20  
21  
22  
23  
24  
25  
26  
27  
28  
29  
30  
31  
32  
33  
34  
35  
36  
37  
38  
39  
40  
41  
42  
43  
44  
45  
46  
47  
48  
49  
50  
51  
52  
53  
54  
55  
56  
57  
58  
59  
60

Variant. N Engl J Med. 2021 Jul 21:NEJMoa2108891. doi:  
10.1056/NEJMoa2108891. Epub ahead of print. PMID: 34289274.

22. Nasreen S, He S, Chung H, Brown KA, Gubbay JB, Buchan SA, et al. Effectiveness of COVID-19 vaccines against variants of concern in Ontario, Canada. medRxiv. 2021:2021.06.28.21259420.

Confidential

**Table: Demographics and outcomes for individuals with SARS-CoV2 infection from March 1 2020 to June 30 2021 in Alberta and Ontario, Canada**

|                                          | Mar20 to Jan21 (waves 1 & 2) | Feb21-Jun21 (wave 3) |               |                |                |                           |                       | TOTAL                 | p-value (waves 1/2 vs 3) |
|------------------------------------------|------------------------------|----------------------|---------------|----------------|----------------|---------------------------|-----------------------|-----------------------|--------------------------|
|                                          |                              | Nonvariant           | Alpha variant | Delta variants | Other variants | Not tested/ Indeterminate | Sum for wave 3        |                       |                          |
| Number with a positive SARS-CoV2 test    | <b>372,070</b>               | 92,427               | 182,020       | 3,708          | 32,164         | 48,760                    | <b>359,079</b>        | <b>731,149</b>        | -                        |
| < 18 years old, n (%)                    | <b>46641 (12.5%)</b>         | 19884 (21.5%)        | 31875 (17.5%) | 702 (18.9%)    | 5439 (16.9%)   | 8449 (17.3%)              | <b>66349 (18.5%)</b>  | <b>112990 (15.5%)</b> | <.0001                   |
| 18-39 years old, n (%)                   | <b>132339 (35.6%)</b>        | 31017 (33.6%)        | 69101 (38%)   | 1409 (38%)     | 12440 (38.7%)  | 18944 (38.9%)             | <b>132911 (37%)</b>   | <b>265250 (36.3%)</b> | <.0001                   |
| 40-65 years old, n (%)                   | <b>141474 (38%)</b>          | 34832 (37.7%)        | 67697 (37.2%) | 1290 (34.8%)   | 11652 (36.2%)  | 16551 (33.9%)             | <b>132022 (36.8%)</b> | <b>273496 (37.4%)</b> | <.0001                   |
| 65+ years old, n (%)                     | <b>51616 (13.9%)</b>         | 6694 (7.2%)          | 13347 (7.3%)  | 307 (8.3%)     | 2633 (8.2%)    | 4816 (9.9%)               | <b>27797 (7.7%)</b>   | <b>79413 (10.9%)</b>  | <.0001                   |
| Age, median (IQR) Alberta                | <b>36 (23-52)</b>            | 32 (18-47)           | 33 (20-47)    | 32 (20-45)     | 35 (22-48)     | Not applicable            | <b>33 (19-47)</b>     | <b>35 (21-49)</b>     | <.0001                   |
| Age, median (IQR) Ontario                | <b>41 (26-58)</b>            | 36 (23-54)           | 36 (23-52)    | 35 (22-52)     | 36 (22-52)     | 36 (22-53)                | <b>36 (23-52)</b>     | <b>38 (24-55)</b>     | <.0001                   |
| Male, n (%)                              | <b>181852 (48.9%)</b>        | 47217 (51.1%)        | 92315 (50.7%) | 1898 (51.2%)   | 16700 (51.9%)  | 24492 (50.2%)             | <b>182622 (50.9%)</b> | <b>364474 (49.8%)</b> | <.0001                   |
| <b>Death</b>                             |                              |                      |               |                |                |                           |                       |                       |                          |
| Death within 30d*                        | <b>8223 (2.2%)</b>           | 532 (0.6%)           | 1384 (0.8%)   | 52 (1.4%)      | 325 (1%)       | 346 (0.7%)                | <b>2639 (0.7%)</b>    | <b>10862 (1.5%)</b>   | <.0001                   |
| Age, median (IQR) Alberta                | <b>85 (76, 91)</b>           | 75 (63, 86)          | 74 (65, 85)   | 72 (69, 80)    | 66 (56, 73)    | Not applicable            | <b>74 (63, 85)</b>    | <b>84 (73, 90)</b>    | <.0001                   |
| Age, median (IQR) Ontario                | <b>85 (77-91)</b>            | 79 (70-87)           | 75 (65-84)    | 73 (60-86)     | 74 (65-84)     | 78 (66-86)                | <b>76 (66-85)</b>     | <b>83 (73-90)</b>     | <.0001                   |
| Male, n (%)                              | <b>4083 (49.7%)</b>          | 302 (56.8%)          | 822 (59.4%)   | 30 (57.7%)     | 202 (62.2%)    | 192 (55.5%)               | <b>1548 (58.7%)</b>   | <b>5631 (51.8%)</b>   | <.0001                   |
| Days to death, median (IQR) in Alberta   | <b>8 (4, 13)</b>             | 8 (3, 14)            | 9 (4, 17)     | 12 (4, 18)     | 9 (3, 14)      | Not applicable            | <b>9 (4, 15)</b>      | <b>8 (4, 13)</b>      | 0.12                     |
| Days to death, median (IQR) in Ontario   | <b>10 (6-16)</b>             | 11 (6-17)            | 12 (7-19)     | 16 (11-21)     | 13 (6-20)      | 10 (4-16)                 | <b>12 (6-19)</b>      | <b>11 (6-17)</b>      | <.0001                   |
| <b>All-cause hospitalization</b>         |                              |                      |               |                |                |                           |                       |                       |                          |
| Hospital admission within 30d*           | <b>20061 (5.4%)</b>          | 3470 (3.8%)          | 11552 (6.3%)  | 295 (8%)       | 2321 (7.2%)    | 2618 (5.4%)               | <b>20256 (5.6%)</b>   | <b>40317 (5.5%)</b>   | <.0001                   |
| Age, median (IQR) Alberta                | <b>65 (48, 79)</b>           | 55 (38, 69)          | 54 (41, 66)   | 57 (39, 69)    | 53 (40, 62)    | Not applicable            | <b>54 (40, 67)</b>    | <b>59 (44, 74)</b>    | <.0001                   |
| Age, median (IQR) Ontario                | <b>69 (55-82)</b>            | 63 (48-77)           | 59 (46-71)    | 57 (43-70)     | 60 (48-72)     | 61 (41-75)                | <b>60 (46-73)</b>     | <b>64 (50-77)</b>     | <.0001                   |
| Male, n (%)                              | <b>10714 (53.4%)</b>         | 1878 (54.1%)         | 6284 (54.4%)  | 169 (57.3%)    | 1335 (57.5%)   | 1381 (52.8%)              | <b>11047 (54.5%)</b>  | <b>21761 (54%)</b>    | 0.02                     |
| Median length of stay, day (IQR) Alberta | <b>7 (3, 13)</b>             | 5 (3, 10)            | 5 (3, 10)     | 6 (3, 10)      | 6 (3, 10)      | Not applicable            | <b>5 (3, 10)</b>      | <b>6 (3, 11)</b>      | <.0001                   |
| Median length of stay, day (IQR) Ontario | <b>7 (3-16)</b>              | 6 (3-11)             | 6 (3-11)      | 6 (3-11)       | 7 (3-12)       | 6 (2-11)                  | <b>6 (3-12)</b>       | <b>7 (3-13)</b>       | <.0001                   |



STROBE Statement—Checklist of items that should be included in reports of *cohort studies*

|                              | Item No | Recommendation                                                                                                                                                                                    | Page No       |
|------------------------------|---------|---------------------------------------------------------------------------------------------------------------------------------------------------------------------------------------------------|---------------|
| <b>Title and abstract</b>    | 1       | (a) Indicate the study's design with a commonly used term in the title or the abstract                                                                                                            | 2             |
|                              |         | (b) Provide in the abstract an informative and balanced summary of what was done and what was found                                                                                               | 2             |
| <b>Introduction</b>          |         |                                                                                                                                                                                                   |               |
| Background/rationale         | 2       | Explain the scientific background and rationale for the investigation being reported                                                                                                              | 3             |
| Objectives                   | 3       | State specific objectives, including any prespecified hypotheses                                                                                                                                  | 4             |
| <b>Methods</b>               |         |                                                                                                                                                                                                   |               |
| Study design                 | 4       | Present key elements of study design early in the paper                                                                                                                                           | 4             |
| Setting                      | 5       | Describe the setting, locations, and relevant dates, including periods of recruitment, exposure, follow-up, and data collection                                                                   | 4             |
| Participants                 | 6       | (a) Give the eligibility criteria, and the sources and methods of selection of participants. Describe methods of follow-up                                                                        | 4             |
|                              |         | (b) For matched studies, give matching criteria and number of exposed and unexposed                                                                                                               | N/A           |
| Variables                    | 7       | Clearly define all outcomes, exposures, predictors, potential confounders, and effect modifiers. Give diagnostic criteria, if applicable                                                          | 5             |
| Data sources/<br>measurement | 8*      | For each variable of interest, give sources of data and details of methods of assessment (measurement). Describe comparability of assessment methods if there is more than one group              | 4, 5          |
| Bias                         | 9       | Describe any efforts to address potential sources of bias                                                                                                                                         | 5-6           |
| Study size                   | 10      | Explain how the study size was arrived at                                                                                                                                                         | N/A           |
| Quantitative variables       | 11      | Explain how quantitative variables were handled in the analyses. If applicable, describe which groupings were chosen and why                                                                      | 5-6           |
| Statistical methods          | 12      | (a) Describe all statistical methods, including those used to control for confounding                                                                                                             | 5-6           |
|                              |         | (b) Describe any methods used to examine subgroups and interactions                                                                                                                               | 5-6           |
|                              |         | (c) Explain how missing data were addressed                                                                                                                                                       | N/A           |
|                              |         | (d) If applicable, explain how loss to follow-up was addressed                                                                                                                                    | N/A           |
|                              |         | (e) Describe any sensitivity analyses                                                                                                                                                             | N/A           |
| <b>Results</b>               |         |                                                                                                                                                                                                   |               |
| Participants                 | 13*     | (a) Report numbers of individuals at each stage of study—eg numbers potentially eligible, examined for eligibility, confirmed eligible, included in the study, completing follow-up, and analysed | 6             |
|                              |         | (b) Give reasons for non-participation at each stage                                                                                                                                              | N/A           |
|                              |         | (c) Consider use of a flow diagram                                                                                                                                                                | N/A           |
| Descriptive data             | 14*     | (a) Give characteristics of study participants (eg demographic, clinical, social) and information on exposures and potential confounders                                                          | Table 1       |
|                              |         | (b) Indicate number of participants with missing data for each variable of interest                                                                                                               | Table 1       |
|                              |         | (c) Summarise follow-up time (eg, average and total amount)                                                                                                                                       | 30 days       |
| Outcome data                 | 15*     | Report numbers of outcome events or summary measures over time                                                                                                                                    | 7 and Table 1 |

|    |                          |    |                                                                                                                                                                                                              |               |
|----|--------------------------|----|--------------------------------------------------------------------------------------------------------------------------------------------------------------------------------------------------------------|---------------|
| 1  | Main results             | 16 | (a) Give unadjusted estimates and, if applicable, confounder-adjusted estimates and their precision (eg, 95% confidence interval). Make clear which confounders were adjusted for and why they were included | 7 and Table 1 |
| 2  |                          |    | (b) Report category boundaries when continuous variables were categorized                                                                                                                                    | Table 1       |
| 3  |                          |    | (c) If relevant, consider translating estimates of relative risk into absolute risk for a meaningful time period                                                                                             | N/A           |
| 4  |                          |    |                                                                                                                                                                                                              |               |
| 5  | Other analyses           | 17 | Report other analyses done—eg analyses of subgroups and interactions, and sensitivity analyses                                                                                                               | 7 and Table 1 |
| 6  |                          |    |                                                                                                                                                                                                              |               |
| 7  |                          |    |                                                                                                                                                                                                              |               |
| 8  |                          |    |                                                                                                                                                                                                              |               |
| 9  |                          |    |                                                                                                                                                                                                              |               |
| 10 |                          |    |                                                                                                                                                                                                              |               |
| 11 | <b>Discussion</b>        |    |                                                                                                                                                                                                              |               |
| 12 | Key results              | 18 | Summarise key results with reference to study objectives                                                                                                                                                     | 8             |
| 13 | Limitations              | 19 | Discuss limitations of the study, taking into account sources of potential bias or imprecision. Discuss both direction and magnitude of any potential bias                                                   | 9-10          |
| 14 |                          |    |                                                                                                                                                                                                              |               |
| 15 | Interpretation           | 20 | Give a cautious overall interpretation of results considering objectives, limitations, multiplicity of analyses, results from similar studies, and other relevant evidence                                   | 8-11          |
| 16 |                          |    |                                                                                                                                                                                                              |               |
| 17 | Generalisability         | 21 | Discuss the generalisability (external validity) of the study results                                                                                                                                        | 11            |
| 18 |                          |    |                                                                                                                                                                                                              |               |
| 19 |                          |    |                                                                                                                                                                                                              |               |
| 20 |                          |    |                                                                                                                                                                                                              |               |
| 21 | <b>Other information</b> |    |                                                                                                                                                                                                              |               |
| 22 | Funding                  | 22 | Give the source of funding and the role of the funders for the present study and, if applicable, for the original study on which the present article is based                                                | 1 and 12      |
| 23 |                          |    |                                                                                                                                                                                                              |               |
| 24 |                          |    |                                                                                                                                                                                                              |               |
| 25 |                          |    |                                                                                                                                                                                                              |               |

\*Give information separately for exposed and unexposed groups.

**Note:** An Explanation and Elaboration article discusses each checklist item and gives methodological background and published examples of transparent reporting. The STROBE checklist is best used in conjunction with this article (freely available on the Web sites of PLoS Medicine at <http://www.plosmedicine.org/>, Annals of Internal Medicine at <http://www.annals.org/>, and Epidemiology at <http://www.epidem.com/>). Information on the STROBE Initiative is available at <http://www.strobe-statement.org>.
